# Supplementary material for: Flight and Reproduction Variations of Rice Leaf Roller, Cnaphalocrocis medinalis in Response to Different Rearing Temperatures
Source: MDPI journal article supplement (doi:10.3390/insects12121083), 2021-12-02
Supplement: s1 [file s1]

**Supplementary Table S1.** Reproductive performance of *C. medinalis* females between the flying and non-flying groups treated by different rearing temperatures during the immature stage

| Parameters                      | Treatments | Rearing temperatures |                     |                    |                  |
|---------------------------------|------------|----------------------|---------------------|--------------------|------------------|
|                                 |            | 18 °C                | 22 °C               | 26 °C              | 34 °C            |
| Preoviposition period (d)       | Flying     | 6.88 ± 0.49a **      | 6.32 ± 0.71a        | 5.61 ± 0.35a *     | 5.30 ± 0.30 a ** |
|                                 | Control    | 4.91 ± 0.42 b        | 5.12 ± 0.26 b       | 7.97 ± 0.90 a      | 7.38 ± 0.48 a    |
| Period of first oviposition (d) | Flying     | 3.88 ± 0.49 ab       | 4.32 ± 0.71a        | 2.61 ± 0.35 ab     | 2.30 ± 0.30 b ** |
|                                 | Control    | 2.91 ± 0.42 a        | 3.12 ± 0.26 a       | 3.97 ± 0.90 a      | 4.38 ± 0.48 a    |
| Lifetime fecundity              | Flying     | 94.75 ± 16.34 a **   | 46.16 ± 10.48 ab ** | 78.30 ± 17.70 ab   | 30.35 ± 8.61 b   |
|                                 | Control    | 214.23 ± 28.31 a     | 181.40 ± 20.13 a    | 103.20 ± 17.38 b   | 74.62 ± 20.83 b  |
| Mating frequency                | Flying     | 0.33 ± 0.10 a **     | 0.44 ± 0.10 a *     | 0.48 ± 0.11 a      | 0.30 ± 0.10 a    |
|                                 | Control    | 1.05 ± 0.20 a        | 0.81 ± 0.10 ab      | 0.51 ± 0.08 bc     | 0.42 ± 0.10 bc   |
| Female longevity (d)            | Flying     | 15.21 ± 1.07 a       | 9.44 ± 0.89 b **    | 11.96 ± 1.05 ab ** | 9.13 ± 0.55 b    |
|                                 | Control    | 16.27 ± 0.93 a       | 13.74 ± 0.82 a      | 15.54 ± 0.68 a     | 10.58 ± 0.97 b   |
| Oviposition period (d)          | Flying     | 7.92 ± 0.75 a        | 3.72 ± 0.63 b **    | 5.56 ± 0.95 ab     | 3.26 ± 0.44 b    |
|                                 | Nonflying  | 8.05 ± 0.98 a        | 7.76 ± 0.72 a       | 6.74 ± 0.79 ab     | 4.04 ± 0.63 b    |
| Mating percentage (%)           | Flying     | 33.33 ± 9.83 a *     | 44.00 ± 10.13 a *   | 47.83 ± 10.65 a    | 30.43 ± 9.81 a   |
|                                 | Control    | 68.18 ± 10.16 a      | 66.67 ± 7.36 a      | 51.43 ± 8.57 a     | 41.67 ± 10.28 a  |

Different lowercase letters in the same row indicate significant differences by Tukey's HSD test at 5% level. “\*”, “\*\*” represent significant or highly significant differences in the same column by t-test ( $p < 0.05$  or  $p < 0.01$ ). Sample sizes for each flying treatment are 22, 42, 35, 22 and 24 females, and each control treatment are 24, 25, 23, 15 and 23 females, from left to right, respectively.
